# Supplementary material
Source: Research Square preprint supplement (doi:10.21203/rs.3.rs-8868377/v1)
Supplement: Supplementary file 1 [file 8f53282249fb39e274e4d5ce.xlsx]

## Sheet: Final
Country	Region	Language	Submission date	Status	Date of completion and adoption	Start year	End year	CMS party?	Mention of migratory conservation?	Species+	CMS	Action (copy-paste) (translated using DeepL, and Google Translate for Thai)	Type of action	Explicit mention of "migrat*"?	Migratory species mentioned, common names separated by a ;	New or Existing Action	Affiliated GBF target (;)	Was target explicitly stated	Marine/Terrestrial/Freshwater/Not mentioned
Afghanistan	Asia	English	2024-09-04	Final	2023-01-01	2024	2030	Yes	Y	270	119	Support species monitoring initiatives including participatory monitoring and citizen science. (For species listed in Col M)	Species: Monitoring and research programs	Explicit	Sociable Lapwing, Dalmatian Pelican, Ferrugineous Duck, Saker Falcon, Steppe Eagle, Greater Spotted Eagle, Macqueen's Bustard, Imperial Eagle	Existing	4	Explicit	Terrestrial
Afghanistan	Asia	English	2024-09-04	Final	2023-01-01	2024	2030	Yes	Y	270	119	Enact direct payment approaches to reduce harm to protected species. (For species listed in Col M)	Species: Action plans	Explicit	Sociable Lapwing, Dalmatian Pelican, Ferrugineous Duck, Saker Falcon, Steppe Eagle, Greater Spotted Eagle, Macqueen's Bustard, Imperial Eagle	New	4	Explicit	Terrestrial
Afghanistan	Asia	English	2024-09-04	Final	2023-01-01	2024	2030	Yes	Y	270	119	Support OECMs and other sustainable use models. (For species listed in Col M)	Protected areas/sanctuaries	Explicit	Sociable Lapwing, Dalmatian Pelican, Ferrugineous Duck, Saker Falcon, Steppe Eagle, Greater Spotted Eagle, Macqueen's Bustard, Imperial Eagle	Existing	4	Explicit	Terrestrial
Andorra	Europe	Spanish	2025-04-09					No	N	58	64	Define a national network of areas of interest consistent with neighboring countries	Protected areas/sanctuaries	Implicit		New	3	Implicit	Not mentioned
Argentina	South America	Spanish	2024-11-01	Final	2024-10-30	2025	2030	Yes	Y	182	90	This Law approves the Inter-American Convention for the Protection and Conservation of Sea Turtles, whose objective is to promote the protection, conservation, and recovery of sea turtle populations and the habitats on which they depend, based on the most reliable scientific data available and considering the environmental, socioeconomic, and cultural characteristics of the Parties.	Protected areas/sanctuaries, Legislation, Species: Population recovery programs, Species: Monitoring and research programs	Explicit	Sea turtles	Existing	3, 4, 14	Implicit	Marine
Argentina	South America	Spanish	2024-11-01	Final	2024-10-30	2025	2030	Yes	Y	182	90	Raising awareness and environmental education about Argentina's endangered species. It is essential for citizens to understand endangered species and the causes that have led to their status. The proposal is to identify and highlight the main threats and call on society as a whole to be part of the solution. In the marine environment, we highlight the Franciscana dolphin, the seahorse, sea turtle…	Information sharing/capacity building	Explicit	Franciscana Dolphin, Seahorse, Sea turtles, Sharks, Rays, Houndfish, Dogfish	New	3, 4	Implicit	Marine
Argentina	South America	Spanish	2024-11-01	Final	2024-10-30	2025	2030	Yes	Y	182	90	Research project to better characterize the behavior of sea turtles in the Argentine Sea: Knowledge is required to establish fisheries management measures that prevent the interaction and incidental mortality of the three endangered species of sea turtles in the Argentine Sea.	Species: Monitoring and research programs	Explicit	Sea turtles	New	20	Potential	Marine
Argentina	South America	Spanish	2024-11-01	Final	2024-10-30	2025	2030	Yes	Y	182	90	National Action Program to Reduce the Interaction of Sea Turtles with Fisheries in the Argentine Republic (Resolution of the Federal Fisheries Council No. 14/2018): aims to reduce the impact of fisheries on sea turtles in waters under Argentine jurisdiction, within the framework of ecosystem-based management.	Species: Bycatch/Harvesting risk	Explicit	Sea turtles	Existing	4	Implicit	Marine
Argentina	South America	Spanish	2024-11-01	Final	2024-10-30	2025	2030	Yes	Y	182	90	National Action Program to Reduce the Interaction of Sea Turtles with Marine Debris in the Argentine Republic (COFEMA Resolution No. 317/2015): aims to reduce the interaction between sea turtles and marine debris found in areas used for their feeding and as migratory corridors.	Species: Pollution	Explicit	Sea turtles	Existing	7	Implicit	Marine
Argentina	South America	Spanish	2024-11-01	Final	2024-10-30	2025	2030	Yes	Y	182	90	National Conservation Plan for the Jaguar Natural Monument: This plan aims to identify spaces for the creation of new protected areas, taking into account conservation corridors, connectivity with existing protected natural areas, territorial planning of native forests, and conservation landscape zones for the Jaguar. It also seeks to improve the management of protected areas at the provincial le…	Corridor, Protected areas/sanctuaries, International collaboration (partnerships/regional action plans/intl networks), Species: Action plans, Species: Infrastructure	Explicit	Jaguars	New	3, 4, 8	Potential	Terrestrial
Argentina	South America	Spanish	2024-11-01	Final	2024-10-30	2025	2030	Yes	Y	182	90	The goal is to establish the ParanÃ¡ Delta as an integrated corridor where protected areas and other conservation measures are strategic spaces for biodiversity and connectivity.	Corridor, Protected areas/sanctuaries	Implicit		New	3, 2	Implicit	Not mentioned
Argentina	South America	Spanish	2024-11-01	Final	2024-10-30	2025	2030	Yes	Y	182	90	Inclusion of qualitative indicators and improvements in the connectivity and ecological representativeness of protected areas.	Network of domestic protected areas	Implicit		New	21	Potential	Not mentioned
Argentina	South America	Spanish	2024-11-01	Final	2024-10-30	2025	2030	Yes	Y	182	90	This Law approves the Convention on the Conservation of Migratory Species of Wild Animals, adopted in Bonn, Federal Republic of Germany, on June 23, 1979. It includes all the powers associated with the implementation of this Law.	International collaboration (partnerships/regional action plans/intl networks), CMS participation	Explicit		Existing	3, 4	Explicit	Not mentioned
Argentina	South America	Spanish	2024-11-01	Final	2024-10-30	2025	2030	Yes	Y	182	90	National Program for the Conservation of Endangered Species: This program includes: Armadillo Project, Southern Huemul Project, Jaguar Project, Taruca Project, Marsh Deer Project, Pampas Deer Project, Migratory Cauquenes Project, Aguará Guazú Project, Yellow Cardinal Project, Loica Pampeana Project, and Tapir Project. These projects are based on actions to preserve these species and their habitat…	Species: Population recovery programs, Species: Action plans, Habitat restoration	Explicit	Migratory Chloephaga geese	Existing	4	Explicit	Terrestrial
Argentina	South America	Spanish	2024-11-01	Final	2024-10-30	2025	2030	Yes	Y	182	90	Funding, implementation, control, and monitoring of species: Escalandrun (Carcharias Taurus) At the national level, actions will be promoted within the Shark Action Plan that include the species in both sport and artisanal fisheries management. At the regional level, actions identified as priorities for the three countries that share the population (Uruguay, Brazil, and Argentina) will be promote…	International collaboration (partnerships/regional action plans/intl networks), Species: Action plans, Species: Monitoring and research programs	Explicit	Sand tiger shark	Existing	4	Explicit	Marine
Argentina	South America	Spanish	2024-11-01	Final	2024-10-30	2025	2030	Yes	Y	182	90	The goal of this project is to halt the rapid decline of the Hooded Grebe population. The specific objectives are: to monitor the status of the Hooded Grebe populations; to detect, monitor, and protect their nesting colonies through the implementation of the “Colony Guardians” strategy; to restore lagoons that are nesting sites; to apply management plans for invasive species that threaten the spe…	Species: Action plans, Species: Monitoring and research programs, Species: Invasives, Habitat restoration	Explicit	Hooded Grebe	Existing	4	Explicit	Freshwater
Argentina	South America	Spanish	2024-11-01	Final	2024-10-30	2025	2030	Yes	Y	182	90	Migratory Shorebirds Project: This project is being carried out at the following pilot sites: Llancanelo Lagoon (Mendoza), Los Pozuelos Lagoon (Jujuy), Mar Chiquita Lagoon, Punta Rasa (both sites in the province of Buenos Aires), and Ansenuza National Park (Córdoba). The project's objectives correspond to the five strategic objectives of the National Shorebird Conservation Plan, which are: to inc…	Species: Action plans, Species: Monitoring and research programs	Explicit	Shorebirds	Existing	4	Explicit	Terrestrial, Marine
Australia	Oceania	English	2024-10-07	Final		2024	2030	Yes	Y	197	95	Australiaâ€™s Strategy for Nature coordinates national delivery of Australiaâ€™s commitments to the Convention on Biological Diversity, the Global Biodiversity Framework, and other international agreements including the United Nations Sustainable Development Goals, the Ramsar Convention on Wetlands and the Convention on Migratory Species	CMS participation	Explicit		Existing	20, 14	Potential	Not mentioned
Austria	Europe	English	########	Final	2024-05-03	2022	2030	Yes	Y	271	150	Further fragmentation and development of forest areas, especially in areas with little forest and in large unexploited forest areas, are minimised.	Corridor, Species: Wildlife crossing/Barrier removal	Implicit		Existing	2, 3, 4	Explicit	Not mentioned
Austria	Europe	English	########	Final	2024-05-03	2022	2030	Yes	Y	271	150	Construction of additional functional ascending and descending fish ladders (migration aids) for continuous fish migration (including fish protection facilities at hydropower plants) (BMLRT, 2021b) and maintenance of existing funding. Conducting research on their effectiveness.	Species: Wildlife crossing/Barrier removal	Explicit	Fish	Existing	4	Implicit	Freshwater
Austria	Europe	English	########	Final	2024-05-03	2022	2030	Yes	Y	271	150	Creating corridors between protected areas and habitats to improve connectivity and facilitate climate-induced species migration (range shifts for local species) and safeguarding the connectivity elements in environmental planning (habitat corridors)	Corridor	Implicit		Existing	1	Implicit	Not mentioned
Austria	Europe	English	########	Final	2024-05-03	2022	2030	Yes	Y	271	150	Establishment of â€œmigratory bird partnershipsâ€ with developing countries; cultural, informal, and financial exchanges, joint actions to protect bird species.	International collaboration (partnerships/regional action plans/intl networks)	Explicit	Birds	Existing	3, 20	Implicit	Terrestrial
Austria	Europe	English	########	Final	2024-05-03	2022	2030	Yes	Y	271	150	Depiction of habitat corridors at all levels of spatial planning in the respective planning documents and optimal consideration in planning and decision-making processes.	Spatial planning, Corridor	Implicit		New	1, 3	Implicit	Not mentioned
Austria	Europe	English	########	Final	2024-05-03	2022	2030	Yes	Y	271	150	Developing and implementing steps to restore the selected additional degraded ecosystems â€“ with consideration of future targets by the EU, of existing area prioritisations (Environment Agency Austria 2021c), of protected area networks and wild animal corridors or of other habitat connection systems ( aimed at safeguarding connectivity with national and European areas (e.g. GrÃ¼nes Band).	Corridor, International collaboration (partnerships/regional action plans/intl networks), Spatial planning	Implicit		New	3	Implicit	Not mentioned
Austria	Europe	English	########	Final	2024-05-03	2022	2030	Yes	Y	271	150	Compulsory designation of blue, green and brown habitat corridors (ecological infrastructure) in line with their roles in regional and interregional planning and their 78 of 144 Biodiversity Strategy Austria 2030+ legally safeguarded protection status in the land zoning and construction planning regulations (networking corridors, green pathway network, strengthening town centres).	Corridor	Implicit		New	12	Implicit	Freshwater, Marine, Terrestrial
Burkina Faso	Africa	French	########	Final		2025	2029	Yes	Y	167	99	CMS	CMS participation	Explicit		Existing	20, 14	Potential	Not mentioned
Canada	North America	English	########	Final		2024	2030	No	Y	236	86	Implementing the Migratory Birds Program: The federal government has the responsibility for migratory birds under the Migratory Birds Convention Act, 1994 for which ECCC takes the lead to protect, conserve, and properly manage migratory bird populations.	Legislation	Explicit	Birds	Existing	4	Explicit	Not mentioned
Canada	North America	English	########	Final		2024	2030	No	Y	236	86	Within a One Health initiative, taking steps to advance wildlife health initiatives through national and international coordination and policy development, and implementing the Pan-Canadian Approach to Wildlife Health to respond to wildlife health issues, including for SAR and migratory birds.	International collaboration (partnerships/regional action plans/intl networks), Species: Population recovery programs	Explicit		New	4	Explicit	Not mentioned
Canada	North America	English	########	Final		2024	2030	No	Y	236	86	The federal government may also explore additional opportunities, including: Developing interoperable data platforms for tracking SAR recovery measures, migratory bird populations, and activities that support recovery reporting, decision making, and collaboration.	Species: Monitoring and research programs	Explicit	Birds	New	4	Explicit	Not mentioned
Canada	North America	English	########	Final		2024	2030	No	Y	236	86	Ensuring sustainable, safe, and legal use and harvest of migratory birds: ECCC delivers monitoring and research programs for some migratory bird species and supports domestic collaborations, fosters international partnerships, and is working to build meaningful relationships with Indigenous Peoples to protect, conserve, and manage migratory birds.	Corridor, International collaboration (partnerships/regional action plans/intl networks), Spatial planning, Species: Monitoring and research programs	Explicit	Birds	Existing	5	Explicit	Not mentioned
Canada	North America	English	########	Final		2024	2030	No	Y	236	86	Supporting species at risk recovery in urban areas: Through the Pan-Canadian Approach to Transforming Species at Risk Conservation in Canada, ECCC is working with the urban development sector and in Priority Places to identify policies, tools, and programs that could benefit species at risk and migratory birds in urban and peri-urban areas.	Species: Population recovery programs, Species: Monitoring and research programs	Explicit	Birds	Existing	12	Explicit	Not mentioned
Canada	North America	English	########	Final		2024	2030	No	Y	236	86	Supporting species at risk recovery in urban areas: By 2025, Canada will develop a strategic conservation framework for species at risk in urban and near-urban areas to be used by regional and local planning authorities and governments. Under Enhanced Nature Legacy, PCâ€™s National Program for Ecological Corridors is working to identify and recognize ecological corridors across the southern to mi…	Corridor	Implicit	Birds	New	12	Explicit	Terrestrial
Canada	North America	English	########	Final		2024	2030	No	Y	236	86	Partnering with other countries for the conservation and sustainable management of global biodiversity: ECCC works collaboratively with domestic NGOs in several Latin American countries to build capacity in scientific research, monitoring, conservation outreach, and education for the protection of migratory birds and to align migratory bird conservation needs with those of people in working lands…	International collaboration (partnerships/regional action plans/intl networks)	Explicit	Birds	Existing	20	Explicit	Not mentioned
Canada	North America	English	########	Final		2024	2030	No	Y	236	86	Proportion of migratory bird game species with healthy populations that support sustainable hunting with nonrestrictive bag limits and season length (used as an indicator)	Species: Monitoring and research programs	Explicit	Birds	Existing	5	Explicit	Not mentioned
Canada	North America	English	########	Final		2024	2030	No	Y	236	86	Preventing and mitigating degradation through existing regulatory and policy frameworks: Migratory Birds Convention Action, 1994	Legislation	Explicit	Birds	Existing	2	Explicit	Not mentioned
Canada	North America	English	########	Final		2024	2030	No	Y	236	86	Canada currently directly manages a diverse portfolio of 37 national parks, 10 national park reserves, one national urban park, 57 National Wildlife Areas (NWAs), and 92 Migratory Bird Sanctuaries.	Protected areas/sanctuaries	Explicit	Birds	Existing	3	Explicit	Not mentioned
Canada	North America	English	########	Final		2024	2030	No	Y	236	86	PC is contributing to terrestrial connectivity through the identification of ecological corridors, mapping national priority areas for ecological corridors and providing support to partners to identify and create corridors.	Corridor, Network of domestic protected areas	Implicit		Existing	3	Explicit	Not mentioned
Canada	North America	English	########	Final		2024	2030	No	Y	236	86	Programs are in place to identify and delineate areas of high biodiversity importance, including Key Biodiversity Areas (KBAs), priority areas for the creation of ecological corridors, wetlands, and other areas of high biodiversity importance, as well as updating Ecologically and Biologically Significant Areas where applicable.	Spatial planning, Important areas delineation	Implicit		Existing	1	Explicit	Not mentioned
China	Asia	Chinese	########	Final	2024-02-16	2024	2030	No	Y	544	222	Based on the distribution of important wild animals and the trend of population diffusion, determine the priority areas for ecological corridor construction, and take near-natural engineering measures to build ecological corridors. Evaluate the protection results of existing important corridors, identify problems and gaps, improve restoration and protection measures, and enhance connectivity. Rem…	Protected areas/sanctuaries, Corridor	Explicit		New	3, 2	Implicit	Not mentioned
China	Asia	Chinese	########	Final	2024-02-16	2024	2030	No	Y	544	222	Conduct an investigation and assessment of the status and effectiveness of in-situ protection of rare and endangered wild animals and plants, and identify protection gaps. Strengthen in-situ protection of important wildlife habitats, rare and endangered wild plant native habitats, important bird migration corridors, important aquatic germplasm resources and living environments. During the 14th Fi…	Corridor, Protected areas/sanctuaries	Explicit	Birds	New	2, 3	Implicit	Not mentioned
China	Asia	Chinese	########	Final	2024-02-16	2024	2030	No	Y	544	222	Improve the spatial network for biodiversity conservation. Promote the construction of a natural conservation area system with national parks as the main body, and strictly observe the red line of ecological protection. Improve the protection guidelines for national key ecological functional areas and priority areas for biodiversity conservation, and curb the adverse effects of excessive resource…	Corridor, Network of domestic protected areas, Protected areas/sanctuaries	Implicit		Existing	2, 3	Implicit	Not mentioned
Colombia	South America	Spanish	########	Final	2024-10-21	2024	2030	No	Y	158	61	La regiÃ³n Andina se destaca por Region: Play a crucial role as a biological corridor and refuge for endemic and migratory species, contributing to the connectivity and resilience of ecosystems in the face of global environmental changes due to their strategic biogeographical status.	Corridor	Explicit		Existing	2, 3	Implicit	Not mentioned
Colombia	South America	Spanish	########	Final	2024-10-21	2024	2030	No	Y	158	61	Development of guides and/or protocols for the management of introduced and non-invasive exotic species. Additionally, national guidelines should be developed to address the problem of biological invasions and identify species that affect or may affect natural resources through listings: Development of a reference list of species used in fishing, including sharks and rays.	Species: Monitoring and research programs, Species: Invasives	Explicit	Sharks, Rays	New	6, 21	Implicit	Marine
Colombia	South America	Spanish	########	Final	2024-10-21	2024	2030	No	Y	158	61	InvÃ­as has an indicator called Wildlife Vulnerability reported in the Road Information System that allows for identifying corridors where wildlife collisions are highly vulnerable and thus implementing mitigation and prevention measures.	Corridor, Important areas delineation, Spatial planning	Implicit		New	4	Implicit	Terrestrial
Colombia	South America	Spanish	########	Final	2024-10-21	2024	2030	No	Y	158	61	Create the Biological Corridors Program for conservation and productive reconversion, focusing on areas where illicit crops have been abandoned or eradicated.	Corridor	Implicit		New	2, 3	Implicit	Terrestrial
Colombia	South America	Spanish	########	Final	2024-10-21	2024	2030	No	Y	158	61	Design and implementation of the Jaguar Corridor project with the goal of improving the capacities of CARs to manage and report illegal jaguar trafficking; promoting social and cultural change with a gender perspective; and improving the species' habitats through landscape management tools, participatory land planning, and multifunctional restoration.	Corridor, Spatial planning, Species: Wildlife crossing/Barrier removal, Information sharing/capacity building	Explicit	Jaguars	New	2, 3, 4, 5	Implicit	Terrestrial
Colombia	South America	Spanish	########	Final	2024-10-21	2024	2030	No	Y	158	61	Effective integration of ecological areas and corridors into territorial planning instruments	Spatial planning	Implicit		New	1	Implicit	Not mentioned
Cuba	South America	Spanish	2024-07-31		2024-01-01	2024	2030	Yes	N	137	55	Redefine declared protected areas and establish effective area-based conservation measures (ABMs), including biological corridors, that increase and maintain connectivity, in areas identified as high priority for the conservation of terrestrial biota in the context of climate change , in order to ensure the continuity of key ecological and evolutionary processes, as well as the conservation of po…	Corridor	Implicit		New	8	Explicit	Not mentioned
Denmark	Europe	English	########	Final	2024-10-18	2024	2030	Yes	N	335	162	Denmark will add more marine areas to the report, as decided in the agreement on the Maritime Spatial Plan of 7th June 2023, as well as the marine bird protection area, which was designated in September 2023.	Protected areas/sanctuaries	Implicit	Seabirds	New	3	Explicit	Marine
Denmark	Europe	English	########	Final	2024-10-18	2024	2030	Yes	N	335	162	Work is underway to designate up to three additional national parks to create large connected natural areas	Protected areas/sanctuaries	Implicit		New	3	Explicit	Not mentioned
Denmark	Europe	English	########	Final	2024-10-18	2024	2030	Yes	N	335	162	Nature Plan Denmark required the municipalities to designate a Green map of Denmark for the municipal planning. The purpose of the Green map of Denmark is to create bigger and better natural areas with improved physical and/or functional connectivity in nature designations across municipal boundaries. A local council for nature was established for the municipalities in 2017/2018, which assisted t…	Spatial planning, Protected areas/sanctuaries	Implicit		Existing	12	Explicit	Terrestrial
European Union	Europe	English	########	Final	2020-05-20	2020	2030	Yes	Y		134	In addition, in order to have a truly coherent and resilient Trans-European Nature Network, it will be important to set up ecological corridors to prevent genetic isolation, allow for species migration, and maintain and enhance healthy ecosystems. In this context, investments in green and blue infrastructure and cooperation across borders among Member States should be promoted and supported, incl…	Corridor, International collaboration (partnerships/regional action plans/intl networks)	Explicit		New	3, 20	Implicit	Not mentioned
European Union	Europe	English	########	Final	2020-05-20	2020	2030	Yes	Y		134	This can be done by removing or adjusting barriers that prevent the passage of migrating fish and improving the flow of water and sediments. To help make this a reality, at least 25,000 km of rivers will be restored into free-flowing rivers by 2030 through the removal of primarily obsolete barriers and the restoration of floodplains and wetlands.	Species: Wildlife crossing/Barrier removal	Explicit	Fish	New	2	Implicit	Freshwater
European Union	Europe	English	########	Final	2020-05-20	2020	2030	Yes	Y		134	The by-catch of species threatened with extinction must also be eliminated or reduced to a level that allows full recovery. This should also be the case for those in bad conservation status or not in good environmental status. Furthermore, the by-catch of other species45 must be eliminated or, where this is not possible, minimised so as not to threaten their conservation status. To support this, …	Species: Bycatch/Harvesting risk	Implicit		Existing	4	Implicit	Marine
European Union	Europe	English	########	Final	2020-05-20	2020	2030	Yes	Y		134	Member States will then have until the end of 2023 to demonstrate significant progress in legally designating new protected areas and integrating ecological corridors.	Corridor, Protected areas/sanctuaries	Implicit		Existing	3	Implicit	Not mentioned
France	Europe	English	2024-04-26	Final	2023-01-01	2022	2030	Yes	Y	517	242	Reverse the decline of endangered flagship species, particularly those endemic to the French Overseas Territories: Finally, efforts will be intensified to combat accidental mortalities, particularly by-catch in fishing nets affecting small cetaceans, marine turtles and sea birds.	Species: Bycatch/Harvesting risk	Explicit	Cetaceans, Seabirds, Sea turtles	New	4	Explicit	Marine
France	Europe	English	2024-04-26	Final	2023-01-01	2022	2030	Yes	Y	517	242	Measure 13. Supporting the fishing industry in reducing its impact on biodiversity. Action 2. Objective: To provide technical and innovative solutions to reduce the impact of professional fishing on marine species and ecosystems Description of action: Develop a network of innovative fishing techniques and experiments with fishing professionals Continue research to limit pressure on the marine env…	Species: Bycatch/Harvesting risk	Explicit	Cetaceans, Seabirds, Sea turtles	New	10	Explicit	Marine
France	Europe	English	2024-04-26	Final	2023-01-01	2022	2030	Yes	Y	517	242	Measure 9. Reducing light and noise pollution. Action 3. Objective: Strengthen the regulations on light pollution on biodiversity and the monitoring of these regulations to ensure a real effect on the ground. Description of the action: Improve the effectiveness of the regulatory system for combating light pollution by : - Revising the decree of 27 December 2018 relating to the prevention, reducti…	Species: Pollution	Explicit	Birds	New	7	Explicit	Terrestrial
Germany	Europe	German	########	Draft		2025	2030	Yes	Y	345	164	By 2030, other important sections of watercourses in Germany will be longitudinally continuous or free-flowing. The watercourses in Germany are not passable due to many transverse structures, particularly in connection with small hydropower plants. In particular, fish that migrate over long distances, such as the salmon, no longer reach their former spawning and nursery habitats and do not reprod…	Habitat restoration, Species: Wildlife crossing/Barrier removal	Explicit	Fish, Salmon	New	4	Implicit	Freshwater, Marine
Germany	Europe	German	########	Draft		2025	2030	Yes	Y	345	164	Further development of a functional biotope network By 2030, the most important transnational habitat corridors (biotope network axes) will be established and secured so that a functional transnational biotope network is guaranteed over at least 15% of the area. The transnational biotope network affects all terrestrial ecosystems, including settlements. The supra-regional and local networking of …	Corridor	Explicit		New	3, 2	Implicit	Not mentioned
Germany	Europe	German	########	Draft		2025	2030	Yes	Y	345	164	Conserve and enhance Natura 2000 habitats and species	International collaboration (partnerships/regional action plans/intl networks)	Implicit		Existing	3	Implicit	Not mentioned
Germany	Europe	German	########	Draft		2025	2030	Yes	Y	345	164	Ecological permeability of transport routes: By 2030, existing and new transport routes (road, rail, waterway) will have sufficient ecological permeability for all animal species affected by fragmentation across and along the transport mode.	Species: Wildlife crossing/Barrier removal	Implicit		New	4, 12	Implicit	Terrestrial
Germany	Europe	German	########	Draft		2025	2030	Yes	Y	345	164	Target 20.1: Implementing and further developing international biodiversity agreements. Up to and beyond 2030, Germany will continue to fulfil the requirements and targets of its biodiversity-related international agreements, take an active role in their further evolution, purposefully nurture synergies between those agreements and advocate against inefficient duplications. The target explained: …	CMS participation, International collaboration (partnerships/regional action plans/intl networks)	Explicit		Existing	21	Potential	Not mentioned
Germany	Europe	German	########	Draft		2025	2030	Yes	Y	345	164	Action area 12: High-altitude mountains. 12.1.1: By 2027, at least 10% of severely degraded wetlands and open landscapes will be restored by means of suitable measures. Attention will be paid to improving the connectivity of protected and/or restored areas, creating corridors for migratory species and designating resting zones.	Corridor, Network of domestic protected areas, Habitat restoration	Explicit		New	1, 2	Explicit	Terrestrial
Germany	Europe	German	########	Draft		2025	2030	Yes	Y	345	164	Action area 10: Coasts and seas. Coasts and seas are the largest ecosystems on the planet. They are home to an abundance of biodiversity, sequester a large portion of anthropogenic emissions of carbon dioxide and constitute the worldâ€™s largest natural carbon reservoir. They supply raw materials and nutrition, serve as transport routes and recreational spaces, and possess ready stores of renewab…	CMS participation, International collaboration (partnerships/regional action plans/intl networks), Species: Bycatch/Harvesting risk	Explicit		Existing	21	Implicit	Marine
Hungary	Europe	English	2024-06-12	Final	2023-08-01	2023	2030	Yes	Y	261	157	Establishing a coherent network of protected areas, improving the status of protected areas and Natura 2000 sites, and ensuring an appropriate conservation management.	International collaboration (partnerships/regional action plans/intl networks)	Implicit		Existing	3	Implicit	Not mentioned
Hungary	Europe	English	2024-06-12	Final	2023-08-01	2023	2030	Yes	Y	261	157	Prohibiting fireworks and racing of internal combustion engine vehicles in near-natural urban areas that are categorised as wetlands and/or resting and feeding areas for migratory bird species.	Species: Pollution	Explicit	Birds	New	12	Explicit	Terrestrial
India	Asia	English	2025-01-16	Final	2024-10-30	2024	2030	Yes	Y	458	185	The main activities under PE are geared towards: (a) protection and conservation of wild elephants; (b)restoration of natural habitats and traditional corridors/ migratory routes or movement paths; (c)control of poaching and protection from other threats; (d) inter-state and regional/ national level coordination for conservation of elephants; (e) development of required infrastructure and executi…	Habitat restoration, Corridor, Species: Population recovery programs, Species: Bycatch/Harvesting risk	Explicit	Elephant	Existing	4, 2	Implicit	Terrestrial
India	Asia	English	2025-01-16	Final	2024-10-30	2024	2030	Yes	Y	458	185	Initiate actions to restore vital spatial and temporal connectivity (longitudinal, horizontal, vertical and temporal) within riverscapes and ensure environmental flow	Habitat restoration	Implicit		New	2	Implicit	Freshwater
Indonesia	Asia	Indonesian	########	Final		2025	2045	No	Y	209	93	Number of infrastructures built[/rehabilitated] for fish migration routes (fishways) ((indicator))	Species: Wildlife crossing/Barrier removal	Explicit	Fish	Existing	4	Implicit	Freshwater
Iran	Asia	English	########	Draft		2024	2030	Yes	Y	340	199	Support local communities in maintaining and restoring habitat connectivity, involving them in projects like wildlife corridors and migratory route protection	Corridor, Habitat restoration	Explicit		Existing	5	Explicit	Not mentioned
Iran	Asia	English	########	Draft		2024	2030	Yes	Y	340	199	Protect habitat corridors of charismatic species like the Iranian leopard.	Corridor	Explicit	Iranian Leopard	New	1	Explicit	Terrestrial
Ireland	Europe	English	2024-02-08	Final	2023-01-01	2023	2030	Yes	N	293	115	ÃšdarÃ¡s na Gaeltachta will undertake a review of estates and lands within their operational zones, with a view to creating site specific management plans; identifying areas within or ecologically connected to Natura 2000 lands to support delivery on the conservation objectives of these sites; identifying lands suitable for inclusion in the All-Ireland Pollinator Plan and potentially become a par…	Corridor, International collaboration (partnerships/regional action plans/intl networks)	Implicit		New	2, 3	Implicit	Terrestrial
Italy	Europe	Italian	########	Final	2023-01-01	2024	2030	Yes	Y	356	194	Ensure the ecological-functional connection of protected areas at local, national and supranational scales: Ensure that the National Ecological Network is integrated into national planning tools and that it is functional and effectively connected, on a supranational scale, for migratory species crossing Italian territory.	Network of domestic protected areas, Spatial planning	Explicit		New	3, 1	Implicit	Not mentioned
Italy	Europe	Italian	########	Final	2023-01-01	2024	2030	Yes	Y	356	194	CMS also promotes coordinated actions among range countries for many of these species. Among the activities promoted by Italy is support for the creation of an Atlas of Bird Migration in the Afro-Eurasian Region, which will be developed over three years, in part to later propose an Atlas of Animal Migration at the global level.	Species: Monitoring and research programs	Explicit		New	20, 21	Implicit	Not mentioned
Italy	Europe	Italian	########	Final	2023-01-01	2024	2030	Yes	Y	356	194	ensure the application of environmental legislation and protection regimes within the entire system of Italian protected areas and that of the Natura 2000 network sites and ecological networks, both on land and in the marine environment, and at the same time implement and enforce control tools (with a reward system for virtuous protected areas) and evaluation of the effectiveness of management an…	International collaboration (partnerships/regional action plans/intl networks)	Implicit		New	3	Implicit	Freshwater, Marine, Terrestrial
Italy	Europe	Italian	########	Final	2023-01-01	2024	2030	Yes	Y	356	194	Increase connectivity between ecological network nodes and green infrastructures present in urban and peri-urban areas, promoting the connection with core areas, also through de-sealing actions (de-waterproofing of asphalt surfaces) and promoting the adoption of Nature Based Solutions (NBS) to promote the connection between the built environment and the natural environment.	Network of domestic protected areas	Implicit		Existing	3, 12	Implicit	Terrestrial, Marine, Freshwater
Italy	Europe	Italian	########	Final	2023-01-01	2024	2030	Yes	Y	356	194	Ensure the definition and implementation of national plans for maritime spatial management that are consistent with the objectives of the Reference Strategy and that apply an ecosystem-based management approach to reduce the negative impacts of fishing, mining, and other human activities on sensitive species and habitats.	Legislation, Spatial planning, Species: Infrastructure	Implicit		New	1, 10, 14	Implicit	Marine
Italy	Europe	Italian	########	Final	2023-01-01	2024	2030	Yes	Y	356	194	Utilize national plans for maritime spatial management to establish ecologically connected networks of protected areas and other marine spatial protection measures covering at least 30 percent of our seas, designated particularly in offshore areas and in areas critical for biodiversity and fish stock recovery (consistent with Objective A â€œprotected areasâ€).	Network of domestic protected areas, Protected areas/sanctuaries	Implicit		New	3, 2	Implicit	Marine
Japan	Asia	English	2024-07-31	Final	2023-03-31	2023	2031	No	Y	351	151	Establishment of wetland network: For wetlands such as marshes and tidal flats that serve as habitats for a diverse range of fauna and flora, especially migratory waterbirds, the government will promote the establishment of networks between wetlands and cooperation through international frameworks such as the Ramsar Convention and East Asian-Australasian Flyway Partnership (EAAFP), for the conser…	International collaboration (partnerships/regional action plans/intl networks), Habitat restoration	Explicit	Birds, Sea turtles	New	2	Explicit	Marine
Japan	Asia	English	2024-07-31	Final	2023-03-31	2023	2031	No	Y	351	151	Sustainable use of international fishery resources: Regarding the sustainable use and management of highly migratory fish, such as tuna, for which deteriorating resource conditions are concerned, the government will make efforts to develop conservation and management measures based on scientific evidence and to eliminate IUU fishing through the RFMOs, while fully considering Japanâ€™s position in…	Species: Bycatch/Harvesting risk	Explicit	Tuna	Existing	10	Implicit	Marine
Japan	Asia	English	2024-07-31	Final	2023-03-31	2023	2031	No	Y	351	151	Bird Banding Survey: The government will continuously conduct bird banding surveys at bird observation stations in order to promote protection and management of wild birds through collecting and accumulating basic data for improving understanding of their ecology, migration routes, habitat conditions and other aspects.	Species: Monitoring and research programs	Explicit		Existing	4, 20	Implicit	Not mentioned
Japan	Asia	English	2024-07-31	Final	2023-03-31	2023	2031	No	Y	351	151	(Target: Increase Ramsar sites designated area) Ramsar: In addition, especially in the Asia-Pacific region where waterfowl migrating to Japan are identified, the government will promote surveys on the current status of wetlands, support the selection of candidate Ramsar sites and enhance awareness-raising activities, in order to implement the Ramsar Convention in the Asia-Pacific region while pro…	International collaboration (partnerships/regional action plans/intl networks)	Explicit	Birds	Existing	3	Implicit	Freshwater
Japan	Asia	English	2024-07-31	Final	2023-03-31	2023	2031	No	Y	351	151	Target: Implement activities including surveys on migratory birds and organizing of expert workshops in Japan, in order to hold bilateral meetings with each country about every two years in accordance with bilateral conventions and agreements for the protection of migratory birds. 5-5-23 Implementing bilateral conventions and agreements for the protection of migratory birds Regarding bilateral co…	Information sharing/capacity building, International collaboration (partnerships/regional action plans/intl networks)	Explicit		Existing	20, 4	Implicit	Not mentioned
Japan	Asia	English	2024-07-31	Final	2023-03-31	2023	2031	No	Y	351	151	(Target: Increase number of Flyway Network Sites in Japan) Promoting activities by the East Asian-Australasian Flyway Partnership (EAAFP): The EAAFP is an international framework for the protection of migratory waterfowls and their important habitats, which facilitates coordination and cooperation among various stakeholders including relevant ministries, international organizations, and NGOs from…	International collaboration (partnerships/regional action plans/intl networks), Information sharing/capacity building	Explicit		Existing	3, 20	Implicit	Not mentioned
Japan	Asia	English	2024-07-31	Final	2023-03-31	2023	2031	No	Y	351	151	The development of transboundary ecological networks will progress centering on the Asia- Pacific region, such as the conservation and restoration of wetlands visited by migratory birds and the networking of marine protected areas.	International collaboration (partnerships/regional action plans/intl networks)	Explicit		Existing	2, 3	Implicit	Freshwater
Japan	Asia	English	2024-07-31	Final	2023-03-31	2023	2031	No	Y	351	151	Promote the conservation of animals that migrate over long distances in the light of the international coordination effort	Protected areas/sanctuaries	Explicit		New	3	Implicit	Marine
Japan	Asia	English	2024-07-31	Final	2023-03-31	2023	2031	No	Y	351	151	Establish marine protected areas appropriately and improve the management based on scientific knowledge to achieve above objectives.	Protected areas/sanctuaries	Implicit		New	3	Implicit	Marine
Japan	Asia	English	2024-07-31	Final	2023-03-31	2023	2031	No	Y	351	151	The government will reduce bycatch through development of techniques on preventing bycatch of sharks, seabirds, and sea turtles, as well as raising awareness among fishers.	Species: Bycatch/Harvesting risk	Explicit	Sharks, Sea turtles, Seabirds	New	4	Implicit	Marine
Japan	Asia	English	2024-07-31	Final	2023-03-31	2023	2031	No	Y	351	151	Island conservation: Promote the conservation of distinctive ecosystems and endemic biotas through the protection and reproduction for rare species and the control of alien species.	Species: Invasives, Habitat restoration, Protected areas/sanctuaries	Implicit	Sea turtles, Seabirds, Short-tailed Albatross, Common Murre, Seals, Marine Mammals	Existing	6, 2, 3	Implicit	Marine
Japan	Asia	English	2024-07-31	Final	2023-03-31	2023	2031	No	Y	351	151	Strengthen efforts to eliminate and prevent marine pollution through international collaboration	Species: Pollution	Implicit		Existing	7	Implicit	Marine
Japan	Asia	English	2024-07-31	Final	2023-03-31	2023	2031	No	Y	351	151	5-1-4 Annual simultaneous Census on Waterfowl (Anatidae) Population. A nationwide annual simultaneous census on Anatidae population was launched in 1970 in cooperation with all prefectures in Japan, and has been conducted every year since then. The government will compile the results from the census on Anatidae population which is simultaneously conducted nationwide, and will prepare a report, th…	Information sharing/capacity building	Explicit	Waterbirds	Existing	5, 21	Implicit	Terrestrial, Freshwater
Japan	Asia	English	2024-07-31	Final	2023-03-31	2023	2031	No	Y	351	151	5-5-25 Convention on the Conservation of Migratory Species of Wild Animals (CMS). The CMS implements activities including prohibition of hunting, and concluding agreements and memorandums of understanding for each species for the conservation of endangered migratory animals listed in the appendices of the Convention. Japan is not a party to this Convention since Japan has different views with reg…	CMS participation, International collaboration (partnerships/regional action plans/intl networks)	Explicit		Existing	21	Potential	Not mentioned
Japan	Asia	English	2024-07-31	Final	2023-03-31	2023	2031	No	Y	351	151	5-5-23 Implementing bilateral conventions and agreements for the protection of migratory birds Regarding bilateral conventions and agreements for the protection of migratory birds concluded with the United States of America, People's Republic of China, Australia, and Russia, the government will organize meetings with each country about every two years and will exchange information based on this f…	Species: Wildlife crossing/Barrier removal	Implicit	Fish	Existing	1, 4	Potential	Freshwater
Jordan	Europe	English	########	Draft		2024	2050	Yes	N	272	138
Libya	Africa	English	########	Final	2023-12-01	2023	2030	Yes	Y	247	143	By 2030, develop and implement actions to manage and conserve the biodiversity of wild species, especially endemic, endangered and migratory species, within and outside the network of national reserves, and work to restore degraded species through sectoral or site-related plans.	Habitat restoration, Protected areas/sanctuaries	Explicit		New	4	Explicit	Not mentioned
Libya	Africa	English	########	Final	2023-12-01	2023	2030	Yes	Y	247	143	Proposed 4 future reserves	Protected areas/sanctuaries	Explicit	Gazelles, Seabirds	New	3	Implicit	Marine, Terrestrial
Libya	Africa	English	########	Final	2023-12-01	2023	2030	Yes	Y	247	143	Recently declared reserves	Protected areas/sanctuaries	Explicit	Dolphins, Loggerhead Sea Turtle, Birds, Gazelle	Existing	3	Implicit	Terrestrial, Marine, Freshwater
Libya	Africa	English	########	Final	2023-12-01	2023	2030	Yes	Y	247	143	[Mention of CMS]	CMS participation, Information sharing/capacity building	Explicit		Existing	21	Potential	Not mentioned
Liechtenstein	Europe	English	2025-01-10	Final	2024-11-05	2025	2029	Yes	N	149	81
Luxembourg	Europe	French	########	Final		2023	2030	Yes	Y	182	100	Luxembourg has completed the phase of identifying priority areas for biodiversity conservation. Most of these areas are part of the Natura 2000 network, which plays a key role in the biodiversity conservation strategy and now comprises 67 areas of importance for the conservation of habitats and species of Community interest (see the Natura 2000 network map in Annex A), designated under nature pro…	Protected areas/sanctuaries, International collaboration (partnerships/regional action plans/intl networks)	Explicit		Existing	3	Explicit	Not mentioned
Luxembourg	Europe	French	########	Final		2023	2030	Yes	Y	182	100	With regard to the ecological continuity of watercourses, Luxembourg will commit to participating in the EU strategy to eliminate or adapt obstacles that hinder the passage of long-distance migratory fish and to improve water flow. To achieve this ambition, at least 20 km of watercourses will be renatured and restored to free-flowing status by 2030, through the removal of mainly obsolete obstacle…	Habitat restoration	Explicit	Fish	New	2	Explicit	Freshwater
Luxembourg	Europe	French	########	Final		2023	2030	Yes	Y	182	100	Luxembourg will remain committed to international conventions, agreements and initiatives related to the protection of nature and ecosystems, including the Convention on Wetlands (Ramsar), the Convention on the Conservation of European Wildlife and Natural Habitats (Bern), the Convention on Migratory Species (CMS), the Agreement on the Conservation of African-Eurasian Migratory Waterbirds (AEWA),…	International collaboration (partnerships/regional action plans/intl networks), CMS participation	Explicit		Existing	14, 20	Potential	Not mentioned
Malaysia	Asia	English	2024-08-02	Final		2022	2030	No	Y	220	87	Enhance urban and rural biodiversity conservation: Green space and remnant forest patches can still serve as viable habitats for a wide range of wildlife, including migratory birds and pollinating insects. We have to: a. Continue to maintain gazetted land meant for green cover and water reservoirs within cities. b. Support local authorities to increase green and blue spaces as part of the design …	Spatial planning, Habitat restoration, Protected areas/sanctuaries	Explicit	Birds, Insects	New	12	Implicit	Terrestrial
Malaysia	Asia	English	2024-08-02	Final		2022	2030	No	Y	220	87	Expand the extent and ecological representativeness of our protected area network. We must, for example, increase the coverage of under-represented or threatened ecosystems such as limestone hills, peat swamp forests and seagrass beds, increase prime habitats for endangered species, secure ecological corridors and migratory pathways.	Protected areas/sanctuaries	Explicit		New	2, 3	Implicit	Terrestrial, Marine, Freshwater
Malaysia	Asia	English	2024-08-02	Final		2022	2030	No	Y	220	87	Connectivity is also important in marine ecosystems, to ensure that the natural movement and migratory patterns of marine species including fish, turtles, and marine mammals (e.g., dolphins and whales), are able to take place unimpeded at various stages of their life or reproductive cycles. If a natural complement of marine biota is to be managed effectively, it is important not just to save spec…	Corridor, Information sharing/capacity building	Explicit	Fish, Sea turtles, Dolphins, Cetaceans	New	2, 3, 4, 20	Potential	Marine
Malaysia	Asia	English	2024-08-02	Final		2022	2030	No	Y	220	87	Scale-up research and monitoring of migratory species, including their migratory pathways and stopover sites.	Species: Monitoring and research programs	Explicit		New	2, 3, 4, 20, 8, 1	Potential	Not mentioned
Malaysia	Asia	English	2024-08-02	Final		2022	2030	No	Y	220	87	Incorporate research and monitoring outputs, and important sites for migratory species into spatial planning and area-based conservation measures.	Spatial planning	Explicit		New	1, 3	Implicit	Not mentioned
Malaysia	Asia	English	2024-08-02	Final		2022	2030	No	Y	220	87	Review wildlife legislation to ensure that rare, threatened and endangered migratory species are legally protected.	Legislation	Explicit		New	14	Implicit	Not mentioned
Malaysia	Asia	English	2024-08-02	Final		2022	2030	No	Y	220	87	Enhance regional cooperation on migratory species.	International collaboration (partnerships/regional action plans/intl networks)	Explicit		Existing	20	Implicit	Not mentioned
Malaysia	Asia	English	2024-08-02	Final		2022	2030	No	Y	220	87	Implement appropriate mitigation techniques and bycatch reduction devices, in particular Turtle Excluder Devices (TED) to reduce bycatch of non-target fish species and marine megafauna.	Species: Bycatch/Harvesting risk	Explicit		New	4	Implicit	Marine
Malaysia	Asia	English	2024-08-02	Final		2022	2030	No	Y	220	87	[Indicator development] By 2030, identification, establishment, and recognition of migratory sites for conservation has increased	Species: Monitoring and research programs, Protected areas/sanctuaries	Explicit		New	3	Implicit	Not mentioned
Malaysia	Asia	English	2024-08-02	Final		2022	2030	No	Y	220	87	Increase areas of global importance for biodiversity conservation: Malaysia is a party to several multilateral environmental agreements and platform pertaining to biodiversity conservation, including the Convention on Wetlands of International Importance, especially Waterfowl Habitat (RAMSAR) and the East Asian- Australasian Flyway Partnership (EAAFP); the UNESCO Man and the Biosphere Programme (…	International collaboration (partnerships/regional action plans/intl networks)	Explicit		Existing	21	Implicit	Not mentioned
Malta	Europe	English	########	Final	2024-01-01	2024	2030	Yes	N	266	125	By 2030, 30% of Maltese land and 30% of the Maltese Fisheries Management Zone (FMZ) are legally protected and form part of the comprehensive and ecologically representative National Ecological Network. As part of this effort, the management of Natura 2000 sites is strengthened.	Network of domestic protected areas, International collaboration (partnerships/regional action plans/intl networks)	Implicit		New	2, 3	Implicit	Marine
Mauritania	Africa	French	########	Final	2024-10-02	2022	2030	Yes	N	288	153
Mexico	South America	Spanish	########	Final		2023	2030	No	N	225	89
Moldova	Europe	English						Yes	Y			Creation of ecological corridors between forest bodies, including between PAs, to improve the probability of survival of threatened species through provision of migratory routes and other suitable habitats	Corridor, Network of domestic protected areas	Explicit		New	2, 3	Implicit	Terrestrial
Moldova	Europe	English						Yes	Y			CMS	CMS participation	Explicit		Existing	21	Potential	Not mentioned
Netherlands	Europe	Dutch	2025-04-01	Final	2024-10-18	2024	2030	Yes	Y	372	155	The commitment to area restoration and protection are described under action goals 2 and 3. Internationally important natural areas in the Netherlands have been designated as Natura 2000 areas. The protection of these areas focuses on species and habitat types for which this is mandatory under the European Birds and Habitats Directives. In addition, provinces also designate Nature Network Netherl…	Habitat restoration, Protected areas/sanctuaries, International collaboration (partnerships/regional action plans/intl networks)	Implicit		Existing	4	Explicit	Not mentioned
Netherlands	Europe	Dutch	2025-04-01	Final	2024-10-18	2024	2030	Yes	Y	372	155	The Black-tailed Godwit Action Plan: The national government and provinces are stepping up their efforts to protect meadow birds by implementing the Black-tailed Godwit Action Plan. The Black-tailed Godwit Action Plan is part of the National Strategic Plan for the new Common Agricultural Policy 2023-2027. It has been agreed with the provinces that â‚¬69.5 million will be made available for the im…	Habitat restoration, Species: Population recovery programs, Species: Action plans	Explicit	Black-tailed Godwit	New	4	Explicit	Terrestrial
Netherlands	Europe	Dutch	2025-04-01	Final	2024-10-18	2024	2030	Yes	Y	372	155	The National Fishway Map: In fulfillment of the Water Framework Directive (see action target 7) measures are being taken to remove barriers for migratory fish. An overview of the national state of affairs including results and tasks can be found on the National Fish Route Map.	Habitat restoration, Species: Wildlife crossing/Barrier removal	Explicit	Fish	New	4	Explicit	Freshwater
Netherlands	Europe	Dutch	2025-04-01	Final	2024-10-18	2024	2030	Yes	Y	372	155	plans are already in place to protect sharks and rays, porpoises and seals: â€¢ Sharks and Rays Action Plan: A Sharks and Rays Action Plan 2022-2027 was based on a quick scan of the previous Action Plan and a Program of Requirements (prepared with the fishing industry, civil society organizations and scientists). â€¢ Porpoise Protection Plan: The Porpoise Protection Plan was reviewed and strength…	Species: Action plans	Explicit	Sharks, Rays, Porpoises, Seals	Existing	4	Explicit	Marine
Netherlands	Europe	Dutch	2025-04-01	Final	2024-10-18	2024	2030	Yes	Y	372	155	In 2025, there will be a review of whether additional species require additional species protection . Three new conservation plans are currently being developed: two plans focus on birds, 1) gannet (Morus bassanus) and kittiwake (Rissa tridactyla), and 2) great black-backed gull (Larus marinus) and herring gull (Larus argentatus)	Species: Action plans	Explicit	Gannet, Kittiwake, Great Black-backed Gull, Herring Gull	New	4	Explicit	Marine
Netherlands	Europe	Dutch	2025-04-01	Final	2024-10-18	2024	2030	Yes	Y	372	155	The Netherlands has entered into several international agreements to native plants and wildlife in their natural habitats. To protect migratory species, the Netherlands implements the Convention on Migratory Species, or Bonn Convention.	International collaboration (partnerships/regional action plans/intl networks), CMS participation	Explicit		Existing	5	Explicit	Not mentioned
Netherlands	Europe	Dutch	2025-04-01	Final	2024-10-18	2024	2030	Yes	Y	372	155	The Green-blue veining (GBDA) network is fulfilled through the construction, management and restoration of various landscape elements. Woody landscape elements such as hedges, hedgerows and wooded banks reduce wind speed and thus reduce evaporation. In addition, they increase the water holding capacity of the soil and form a refuge for (the migration of) biodiversity	Habitat restoration	Implicit		New	8	Explicit	Terrestrial, Freshwater
Netherlands	Europe	Dutch	2025-04-01	Final	2024-10-18	2024	2030	Yes	Y	372	155	Offshore wind: The ecological after-effects of offshore wind are of great importance to this government. In its policy on offshore wind energy and its implementation, harmful effects on nature are prevented as much as possible and opportunities for nature enhancement are exploited where possible. Examples include not building in protected nature areas, the standstill regulation for bats, and the …	Species: Infrastructure	Explicit	Birds	New	8	Explicit	Marine
Netherlands	Europe	Dutch	2025-04-01	Final	2024-10-18	2024	2030	Yes	Y	372	155	Specifically for eel protection, the EU Eel Regulation80 has been in force since 2007 as a framework for member states to take national measures to improve eel stocks. To this end, the Netherlands has drawn up a national eel management plan with various measures to improve eel stocks. This includes fishery-restricting measures such as a closed period for eel fishing in coastal waters, the IJsselm…	Species: Wildlife crossing/Barrier removal, Species: Population recovery programs	Explicit	Eels	New	10	Explicit	Marine
Netherlands	Europe	Dutch	2025-04-01	Final	2024-10-18	2024	2030	Yes	Y	372	155	CMS & AEWA	CMS participation	Explicit		Existing	21	Potential	Not mentioned
Norway	Europe	Norwegian	########	Final	2024-09-27	2024	2030	Yes	Y	306	141	The regional water management plans 2021-2027 with associated action programs contain over 12,000 measures, of which 1,600 are physical restoration. The restoration measures are intended to improve migration and dispersal routes, physical conditions and water quality.	Habitat restoration, Legislation	Explicit		New	2	Explicit	Freshwater
Norway	Europe	Norwegian	########	Final	2024-09-27	2024	2030	Yes	Y	306	141	Since 1990, a number of measures have been implemented to improve the condition of freshwater, such as liming of watercourses, measures to limit emissions from the agriculture and wastewater sectors, and physical restoration measures. to improve fish migration and recreate habitats.	Habitat restoration, Species: Wildlife crossing/Barrier removal	Explicit	Fish	Existing	4, 2	Implicit	Freshwater
Norway	Europe	Norwegian	########	Final	2024-09-27	2024	2030	Yes	Y	306	141	In each of these areas, the aquaculture industry's environmental impact is assessed through environmental indicators. The traffic light system currently has one environmental indicator, which is the mortality of emigrating salmon smolts as a result of salmon lice. If it is likely that more than 30 percent of salmon smolts will die as a result of salmon lice (red color), the permit capacity in the…	Species: Population recovery programs, Species: Bycatch/Harvesting risk	Explicit	Salmon	Existing	10	Explicit	Freshwater, Marine
Norway	Europe	Norwegian	########	Final	2024-09-27	2024	2030	Yes	Y	306	141	In addition, cod farms can lead to changes in migration, behavior, physiology and reproduction in wild cod, which in turn can affect the survival, growth and recruitment of wild fish. In order to better protect wild cod stocks, in the winter of 2024 the government clarified the ban on farming cod in spawning areas and spawning grounds for wild cod through an amendment to the regulations.	Legislation, Species: Population recovery programs, Species: Bycatch/Harvesting risk	Explicit	Cod	New	10	Explicit	Marine
Norway	Europe	Norwegian	########	Final	2024-09-27	2024	2030	Yes	Y	306	141	The reindeer husbandry agreement includes financial resources for the reindeer husbandry industry. The reindeer husbandry agreement supports the traditional use of grazing areas, with migration between seasonal pastures. In order to receive direct subsidies for reindeer husbandry, it is a condition that the number of reindeer is below the upper fixed number of reindeer. This contributes to sustai…	Species: Population recovery programs	Explicit	Reindeer	Existing	10	Explicit	Terrestrial
Norway	Europe	Norwegian	########	Final	2024-09-27	2024	2030	Yes	Y	306	141	At the same time, it is important that land-use planning and nature management take account of habitats that may be particularly negatively affected by climate change. It is also important to ensure connections between natural areas (so-called green infrastructure or connectivity). Otherwise, it may be difficult for species to move to places with a suitable climate.	Habitat restoration	Implicit		Existing	8	Explicit	Not mentioned
Palestine	Asia	English	########	Final	2022-01-01	2022	2030	No	Y	24		Restructuring entities that are engaged in biodiversity research, education, and conservation and connections between them to be more effective as a conservation network by (among other things) creating channels of communication, joint capacity building, mergers of entities, creation of new entities and NGOs in deserving areas, and management restructuring in the EQA and areas of other ministries…	International collaboration (partnerships/regional action plans/intl networks), CMS participation	Explicit		New	20, 14	Potential	Not mentioned
Palestine	Asia	English	########	Final	2022-01-01	2022	2030	No	Y	24		By 2030, have an updated protected area and KBA network that is logical, science based and manageable	Important areas delineation	Implicit		New	20, 21	Implicit	Not mentioned
Peru	South America	Spanish	########	Final	2024-10-25	2024	2050	Yes	Y	176	72	CMS	CMS participation	Explicit		Existing	14, 20	Potential	Not mentioned
Peru	South America	Spanish	########	Final	2024-10-25	2024	2050	Yes	Y	176	72	Ecological corridors effectively managed by subnational governments to facilitate the continuity and survival of species affected by climate change.	Corridor	Implicit		New	8	Implicit	Not mentioned
Peru	South America	Spanish	########	Final	2024-10-25	2024	2050	Yes	Y	176	72	Improve the management of wildlife species, hydrobiological resources and invasive alien species: In the case of invasive exotic species, the main objective is to reduce the environmental impact of these activities could aggravate the displacement of wild species, thus encouraging new invasions and controlling their voluntary entry by humans, as well as addressing the risk posed by diseases in mi…	Species: Invasives	Explicit	Birds	New	6	Explicit	Marine, Freshwater
Slovenia	Europe	English	########	Final	2020-01-01	2020	2030	Yes	Y	253	177	Update amendments/addenda to CMS	International collaboration (partnerships/regional action plans/intl networks), CMS participation	Explicit		Existing	20, 14	Potential	Not mentioned
Slovenia	Europe	English	########	Final	2020-01-01	2020	2030	Yes	Y	253	177	Amend the regulation governing light pollution using a photometric quantity instead of the average electric power of lamps per unit area, and introduce a multi-stage system of measures to reduce light pollution, such as switching off road lighting taking account of traffic safety, and switching off lighting in advertising facilities.Periodically update (in accordance with the development of techn…	Species: Pollution	Implicit		Existing	7	Implicit	Not mentioned
South Korea	Asia	English	2024-08-02	Final		2024	2028	No	Y	224	124	Analyze the impact of joining the Convention on the Conservation of Migratory Species of Wild Fauna and Flora (CMS) on the utilization of domestic marine species by 2025, and proceed with accession in 2026.	International collaboration (partnerships/regional action plans/intl networks), CMS participation	Explicit		New	20, 14	Potential	Not mentioned
South Korea	Asia	English	2024-08-02	Final		2024	2028	No	Y	224	124	Continue the operation of training programs to nurture marine citizen scientists such as coral schools and tidal flat ecology guide programs, and expand the participation of fishermen and civil society organizations in monitoring protected migratory marine and coastal species. In addition, enable diving centers and members of dive clubs to participate in citizen monitoring of indicator species fo…	Information sharing/capacity building	Explicit		New	21	Implicit	Marine
Spain	Europe	Spanish	2023-01-31	Final		2022	2030	Yes	Y	383	201	in the coming years, significant progress will be made in the approval and application of management instruments for marine protected areas under state jurisdiction, through the approval, before 2025, of new management plans for 58 marine areas of the Natura 2000 Network and for the Marine Protected Area of the Mediterranean Cetacean Migration Corridor, and the updating, before 2023, of the manag…	Protected areas/sanctuaries, Corridor, International collaboration (partnerships/regional action plans/intl networks)	Explicit	Cetaceans	New	3	Explicit	Marine
Spain	Europe	Spanish	2023-01-31	Final		2022	2030	Yes	Y	383	201	In addition, measures will be promoted to reduce noise pollution in the marine environment, in application of Spain's marine strategies In the environmental evaluation processes, the criteria and procedures for those marine activities that generate noise will be reviewed, in accordance with the recommendations of the Convention on the Conservation of Migratory Species of Wild Animals	Species: Pollution	Explicit	Cetaceans	New	7	Explicit	Marine
Spain	Europe	Spanish	2023-01-31	Final		2022	2030	Yes	Y	383	201	Collaboration with third countries that share the territorial scope of migratory species present in Spain will be increased, promoting their conservation and monitoring outside our borders and the reduction and minimization of the causes that threaten them.	International collaboration (partnerships/regional action plans/intl networks), Species: Monitoring and research programs	Explicit		Existing	21	Implicit	Not mentioned
Spain	Europe	Spanish	2023-01-31	Final		2022	2030	Yes	Y	383	201	In order to contribute to the conservation of habitat types and species of Community interest under the Habitats and Birds Directives, Natura 2000 Network sites have been designated, which, as of December 2021, comprises a total of 1,857 protected areas in Spain, 1,468 of which correspond to Sites of Community Interest (SCIs) and 658 Special Protection Areas for Birds (SPAs). Of note is the fact …	Protected areas/sanctuaries, International collaboration (partnerships/regional action plans/intl networks)	Implicit		Existing	3	Implicit	Not mentioned
Spain	Europe	Spanish	2023-01-31	Final		2022	2030	Yes	Y	383	201	The 2019 sexennial reports show difficulties in drawing conclusions on the state of conservation in the marine environment due to the great lack of knowledge of habitat types and species and their trends in that environment. Therefore, the Monitoring System will have a specific program for the marine environment, in coordination with the Marine Strategies and taking into account the relevant info…	Species: Monitoring and research programs	Explicit	Marine Mammals, Sea Turtles, Seabirds	New	20, 21	Implicit	Marine
Spain	Europe	Spanish	2023-01-31	Final		2022	2030	Yes	Y	383	201	Spain will contribute to the future Trans-European Nature Network, both in the terrestrial and marine environment, with its Natura Network protected areas, its natural protected areas, its areas protected by international instruments and its ecological corridors, and part of them will contribute to the EU's general objective of 10% of strictly protected areas.	Corridor, International collaboration (partnerships/regional action plans/intl networks)	Implicit		New	3	Implicit	Not mentioned
Spain	Europe	Spanish	2023-01-31	Final		2022	2030	Yes	Y	383	201	Evaluation of the medium- and long-term representativeness of the networks of protected natural areas and Natura 2000 Network sites, considering the information available on the main climate scenarios.	International collaboration (partnerships/regional action plans/intl networks)	Implicit		New	8	Explicit	Not mentioned
Spain	Europe	Spanish	2023-01-31	Final		2022	2030	Yes	Y	383	201	In the marine environment, Conservation Strategies and Recovery and Conservation Plans will be prepared, approved and implemented, especially for endangered marine species, by the General State Administration. In this area, in 2022 the Strategy for the conservation of sea turtles and the Strategy for the conservation of nacra have been approved; in 2023 and 2024, the updating of the Strategy for …	Legislation	Explicit	Sea Turtles, Cory's Shearwater, Balearic Shearwater, Small Shearwater, Pigeon Shearwater, Shag, Porpoise, Angelshark	Existing	14	Potential	Marine
Suriname	Africa	English	2025-01-20	Final	2024-01-01	2024	2035	No	Y	93	47	Indicator: Technical capacity at the Ministry department has been increased for data collection, modelling and analysis of fish stocks and breeding/spawning grounds, with By-catch of vulnerable and non-target species (e.g. marine turtles in the context of Suriname) (as indicator)	Species: Monitoring and research programs	Explicit	Sea Turtles	New	5	Implicit	Marine
Suriname	Africa	English	2025-01-20	Final	2024-01-01	2024	2035	No	Y	93	47	Implementation decrees for the national law on spatial planning contain provisions related to areas of high/unique biodiversity importance and principles of integrated water resource management and are approved. // 5. Recommendations for legislation on marine spatial planning are provided based on available data and evaluation of the Law on Maritime Zoning (Wet Maritieme Zones) 6. Marine spatial …	Spatial planning, Legislation	Implicit		New	1	Implicit	Marine, Terrestrial
Switzerland	Europe	French	########	Final	2024-11-20	2025	2030	Yes	Y	249	131	To maintain biodiversity, it is essential to take it into account in the planning and programs of all sectors. Today, Switzerland is already actively involved in various international processes relating to biodi- versity, such as the Convention on Biological Diversity, the United Nations Convention to Combat Desertification, the Convention on the Conservation of Migratory Species of Wild Animals …	International collaboration (partnerships/regional action plans/intl networks), Legislation, CMS participation	Explicit		Existing	14	Explicit	Not mentioned
Switzerland	Europe	French	########	Final	2024-11-20	2025	2030	Yes	Y	249	131	Areas that could be suitable in the future for species and natural environments particularly affected by climate change, connecting axes between these areas, which will become increasingly important, and current areas, as well as possible barriers to migration, are identified and located (using a geographic information system).	Protected areas/sanctuaries, Spatial planning	Explicit		New	8	Explicit	Not mentioned
Switzerland	Europe	French	########	Final	2024-11-20	2025	2030	Yes	Y	249	131	To mitigate the effects of the fragmentation of natural environments and migration routes by railroads, the creation of wildlife overpasses or underpasses and the development of accident prevention measures have proved their worth in terms of transverse connectivity.	Habitat restoration, Species: Wildlife crossing/Barrier removal	Explicit		New	2	Explicit	Terrestrial
Switzerland	Europe	French	########	Final	2024-11-20	2025	2030	Yes	Y	249	131	Over the next few years, more lakeshores will need to be revitalized. Biodiversity in lakes depends on intact, continuous watercourses. Certain fish species in particular need to be able to move freely between lake and stream and reach suitable spawning grounds. It will also be necessary study the consequences of climate change on lake ecosystems in depth, in order to limit and adapt to these imp…	Species: Wildlife crossing/Barrier removal	Explicit	Fish	New	10, 8	Explicit	Freshwater
Switzerland	Europe	French	########	Final	2024-11-20	2025	2030	Yes	Y	249	131	in the field of transport (A4.1 Avoid electrocution of birds throughout Switzerland; A7.1 Restore connectivity between natural environments and develop them along the national highway network; A8.1 Make medium-voltage rail pylons safe for birds; A8.2 Make rail tracks permeable; A8.3 Create biodiversity hotspots around railway stations; A8.4 Improve the quality of natural environments along railro…	Species: Wildlife crossing/Barrier removal	Implicit	Birds	New	12	Potential	Terrestrial
Tanzania	Africa	English	########	Draft		2025	2030	Yes	N	288	171	Secure buffer zones and corridors to reconnect core protected areas	Corridor	Implicit		New	2	Explicit	Not mentioned
Tanzania	Africa	English	########	Draft		2025	2030	Yes	N	288	171	Promote and strengthen Regional Cooperation on protection and conservation of trans-boundary terrestrial and marine protected areas and resources	International collaboration (partnerships/regional action plans/intl networks)	Implicit		Existing	2	Explicit	Terrestrial, Marine
Thailand	Asia	Thai	########	Final	2024-10-29	2022	2027	No	Y	326	119	Support to the CMS	CMS participation	Explicit		Existing	5	Explicit	Not mentioned
Thailand	Asia	Thai	########	Final	2024-10-29	2022	2027	No	Y	326	119	Connect legally protected areas and biodiversity conservation areas outside protected areas into a network that increases efficiency in biodiversity protection as a corridor to enable areas to respond more effectively to threats of loss, including responding to risks from climate change.	Corridor, Protected areas/sanctuaries	Implicit		New	3	Implicit	Not mentioned
Thailand	Asia	Thai	########	Final	2024-10-29	2022	2027	No	Y	326	119	Establish measures to monitor and follow wildlife corridors and habitats, and provide remedial measures to those affected by human-wildlife coexistence in areas to reduce conflict and promote coexistence between humans and wildlife.	Corridor, Species: Wildlife crossing/Barrier removal	Implicit		New	3, 4	Implicit	Not mentioned
Togo	Africa	French	########	Final	2024-11-15	2021	2030	Yes	Y	194	121	Creation of wildlife migration corridors to maintain genetic diversity in natural ecosystems	Corridor	Explicit		New	4	Explicit	Not mentioned
Togo	Africa	French	########	Final	2024-11-15	2021	2030	Yes	Y	194	121	Restore ecological connectivity between protected areas and other conservation zones, in particular corridors biological essentials for the movement of populations. Developmemnt of existing ecological corridors between protected areas	Network of domestic protected areas	Explicit		New	3	Explicit	Not mentioned
Togo	Africa	French	########	Final	2024-11-15	2021	2030	Yes	Y	194	121	Strengthening cross-border management of ecological corridors	Corridor, International collaboration (partnerships/regional action plans/intl networks)	Explicit		New	3	Implicit	Not mentioned
Togo	Africa	French	########	Final	2024-11-15	2021	2030	Yes	Y	194	121	Indicator: Number of connected protected areas	Network of domestic protected areas	Implicit		New	3	Implicit	Not mentioned
Togo	Africa	French	########	Final	2024-11-15	2021	2030	Yes	Y	194	121	Indicator: Number of developed ecological corridors between protected areas	Corridor, Network of domestic protected areas	Implicit		New	2, 3	Implicit	Not mentioned
Tonga	Oceania	English	########	Final	2022-01-01	2018	2030	No	N	24	16	By 2030, expand the protected area network and ensure it is representative of ecosystem types in Tonga, with functional corridors.	Corridor	Implicit		New	3	Implicit	Not mentioned
Tunisia	Africa	French	########	Final	2024-10-01	2018	2030	No	Y	269	152	Many of the goals/targets in the 2018-2030 NBSAP support the implementation of a) Strategic plan for migratory species (2015-2023), preliminary draft, 2013	Legislation	Explicit		Existing	14	Implicit	Not mentioned
Tunisia	Africa	French	########	Final	2024-10-01	2018	2030	No	Y	269	152	Integrate Key Biodiversity Areas (KBAs) into regional development plans: Inventory key biodiversity areas (KBAs) at regional and local levels, Draw up a biodiversity conservation action plan for each Key Biodiversity Area (KBA) identified, Integrate the components of the KBA action plan into other national strategies, Develop corridors between key biodiversity areas	Corridor, Spatial planning, Important areas delineation	Explicit		New	1	Explicit	Not mentioned
Tunisia	Africa	French	########	Final	2024-10-01	2018	2030	No	Y	269	152	Strategic plan for migratory species (2015- ) 2023), preliminary project, 2013: Goal 2: Reduce direct pressures on migratory species and their habitats; Goal 3: Improve the conservation status of migratory species and the ecological connectivity and resilience of their habitats; Goal 4: Reinforce the benefits gained for all of favorable conservation status of migratory species	Species: Action plans, Legislation	Explicit		Existing	4	Implicit	Not mentioned
Tunisia	Africa	French	########	Final	2024-10-01	2018	2030	No	Y	269	152	Ecological corridors are an important element in promoting biodiversity in the city. They enable the free movement of species and their access to areas essential to their reproduction, growth, feeding and so on. Taking corridors into account must be a priority for all urban development projects.	Corridor	Implicit		New	3, 2	Implicit	Not mentioned
Tunisia	Africa	French	########	Final	2024-10-01	2018	2030	No	Y	269	152	Action A3.5.3. biodiversity trends in marine and protected areas The effective management of marine and protected areas must accompanied by scientific knowledge providing information on evolution of the area to better guide management actions on basis of scientific data and feed information and monitoring systems for these areas. The development of scientific research programs on the population d…	Species: Monitoring and research programs	Explicit		New	4, 21	Implicit	Marine
Tunisia	Africa	French	########	Final	2024-10-01	2018	2030	No	Y	269	152	Action B4.1.3. Create ecological continuity in cities Ecological corridors are an important element in promoting biodiversity in the city. They enable the free movement of species and their access to areas essential to their reproduction, growth, feeding and so on. Taking corridors into account must be a priority for all urban development projects.	Corridor	Implicit		New	3, 2	Implicit	Terrestrial
Uganda	Africa	English	########	Draft		2025	2030	Yes	Y	235	133	Support protection and restoration measures for degraded ecosystems, threatened species and migratory routes in oil exploration and production regions	Habitat restoration, Species: Infrastructure	Explicit		New	4	Potential	Terrestrial
Uganda	Africa	English	########	Draft		2025	2030	Yes	Y	235	133	Support transboundary management of fisheries resources	International collaboration (partnerships/regional action plans/intl networks)	Implicit		Existing	10	Implicit	Marine
Uganda	Africa	English	########	Draft		2025	2030	Yes	Y	235	133	Establish/maintain viable wildlife/biodiversity corridors with respect to community safeguards	Corridor	Implicit		New	3	Implicit	Not mentioned
United Arab Emirates	Asia	Arabic	2024-10-09	Final	2023-12-01	2024	2031	Yes	Y	232	125	In 2017, the Convention on Biological Diversity (CBD) adopted five marine areas of global biological and ecological importance, nominated by the UAE during the regional workshop, in the Northwest Indian Ocean and Gulf region. The marine areas are Marwah Marine Reserve in the Emirate of Abu Dhabi, Al Yasat and its adjacent southwest region, Jebel Ali Marine Reserve in Dubai, Sir Bu Nair Island, an…	Information sharing/capacity building, International collaboration (partnerships/regional action plans/intl networks)	Implicit		Existing	3, 4, 20	Potential	Marine
United Arab Emirates	Asia	Arabic	2024-10-09	Final	2023-12-01	2024	2031	Yes	Y	232	125	In 2015, two sites in the UAE were included in the International Network of Important Marine Turtle Areas (IMTA) of the Memorandum of Understanding on the Conservation and Management of Marine Turtles and their Habitats in the Indian Ocean and Southeast Asia, namely Sir Bonaire Island and Butina Island. The listing recognizes the global importance of these two sites for sea turtles, as they repre…	Protected areas/sanctuaries, International collaboration (partnerships/regional action plans/intl networks)	Explicit		Existing	3, 4, 20	Potential	Marine
United Arab Emirates	Asia	Arabic	2024-10-09	Final	2023-12-01	2024	2031	Yes	Y	232	125	CMS	CMS participation	Explicit		Existing	20, 14	Potential	Not mentioned
United Kingdom	Europe	English	2025-04-07		26/02/2025			Yes	N	491	214	In Wales, our refreshed Nature Recovery Action Plan (NRAP) will set out the objectives and key actions needed in Wales to achieve our ambitions for nature recovery as part of our Resilient Wales goals and international commitments to halting the loss of biodiversity. We are strengthening our legislative framework by introducing statutory biodiversity targets. We are also helping to tackle the nat…	Habitat restoration	Explicit		New	2	Implicit	Terrestrial, Marine, Freshwater
Venezuela	South America	Spanish	########	Final	2024-10-29	2024	2030	No	Y	135	53	In this way, specific projects aimed at the recovery of endangered species and the restoration of degraded ecosystems will be promoted within the ABRAE, prioritizing those species and ecosystems that play fundamental ecological roles or are most at risk. These initiatives will include species reintroduction programs, control of invasive species and restoration of critical habitats. Finally, ecolo…	Habitat restoration, Species: Invasives, Corridor	Explicit		New	3	Explicit	Not mentioned
Venezuela	South America	Spanish	########	Final	2024-10-29	2024	2030	No	Y	135	53	Protection of coastal areas of special importance for nesting, feeding, and sheltering of coastal and migratory seabirds.	Habitat restoration	Explicit		New	1, 3, 12, 13, 14, 22, 23	Explicit	Marine
Venezuela	South America	Spanish	########	Final	2024-10-29	2024	2030	No	Y	135	53	Establishment of urban and suburban green ecological corridors to ensure the genetic flow and movement of native species, ensuring an increase in green areas in cities.	Corridor	Implicit		New	12	Explicit	Terrestrial
Vietnam	Asia	English	########	Final	2022-01-28	2022	2030	No	Y	316	116	Effectively conserve wild species, especially prioritized endangered, precious and rare species, as well as migratory species; prevent any further extinction of wild species; improve the population status of at least 10 prioritized endangered, precious and rare species; and collect and preserve at least 100,000 genetic resources of wild species, cultivars and livestock breeds.	Species: Population recovery programs	Explicit		New	4	Implicit	Not mentioned
Vietnam	Asia	English	########	Final	2022-01-28	2022	2030	No	Y	316	116	Implement protection measures to effectively prevent deforestation, illegal logging, coral reefs destruction and seagrass beds degradation; safeguard key breeding areas, concentration areas of young and juvenile aquatic species, as well as aquatic speciesâ€™ migration routes; undertake the release of native and endemic aquatic species of economic and scientific value into natural waters bodies; r…	Protected areas/sanctuaries	Explicit		New	3, 4	Implicit	Marine, Freshwater, Terrestrial
Vietnam	Asia	English	########	Final	2022-01-28	2022	2030	No	Y	316	116	Develop and implement the Conservation Program for endangered, precious and rare species prioritized for protection; focus on in situ conservation, research on conservation breeding and rewilding for a number of endangered, precious and rare species prioritized for protection; manage and protect migratory species, including protecting their habitats, transboundary migration routes and stop-over s…	Protected areas/sanctuaries, Habitat restoration, International collaboration (partnerships/regional action plans/intl networks)	Explicit		New	3, 4, 2	Implicit	Not mentioned
Vietnam	Asia	English	########	Final	2022-01-28	2022	2030	No	Y	316	116	Periodically update and release the list of endangered, precious and rare species prioritized for protection; update, compile and create an online information portal for Viet Nam Red Book; establish a list of endangered wild species along with appropriate management and protection measures for each species group.	Species: Monitoring and research programs	Implicit		Existing	21	Implicit	Not mentioned
Vietnam	Asia	English	########	Final	2022-01-28	2022	2030	No	Y	316	116	Monitor and control the overexploitation of wildlife, particularly migratory birds during the migration season, aquatic species during breeding season, and ancient forest trees.	Species: Bycatch/Harvesting risk, Species: Monitoring and research programs	Explicit	Birds	New	5	Implicit	Terrestrial, Marine, Freshwater
Vietnam	Asia	English	########	Final	2022-01-28	2022	2030	No	Y	316	116	Apply measure for assisted regeneration and natural recovery of degraded ecosystems in protected areas, high biodiversity areas, and biodiversity corridors.	Corridor, Habitat restoration	Implicit		New	2	Implicit	Not mentioned
Vietnam	Asia	English	########	Final	2022-01-28	2022	2030	No	Y	316	116	Effectively implement the National Biodiversity Conservation Master Plan to 2030, with a vision toward 2050. Based on approved master plans, continue to consolidate and expand the system of natural heritage sites and protected areas; promote the establishment of wetland and marine protected areas; establish and sustainably manage biodiversity corridors connecting protected areas.	Corridor, Network of domestic protected areas, Protected areas/sanctuaries	Implicit		New	3	Implicit	Not mentioned
Yemen	Asia	English	2025-03-06	Final	2024-12-31	2025	2030	Yes	N	255	119	Identification of wildlife corridors between the ecological significant ecosystems to improve connectivity	Corridor	Implicit		New	3	Implicit	Not mentioned
Yemen	Asia	English	2025-03-06	Final	2024-12-31	2025	2030	Yes	N	255	119	Development of the management plans to maintain the wildlife management corridors intact	Corridor	Implicit		New	3	Implicit	Not mentioned
