# Supplementary material
Source: Research Square preprint supplement (doi:10.21203/rs.3.rs-8868377/v1)
Supplement: Supplementary file 1 [file e2c1bc387e486a18b38ce81b.pdf]

## Supplementary Materials

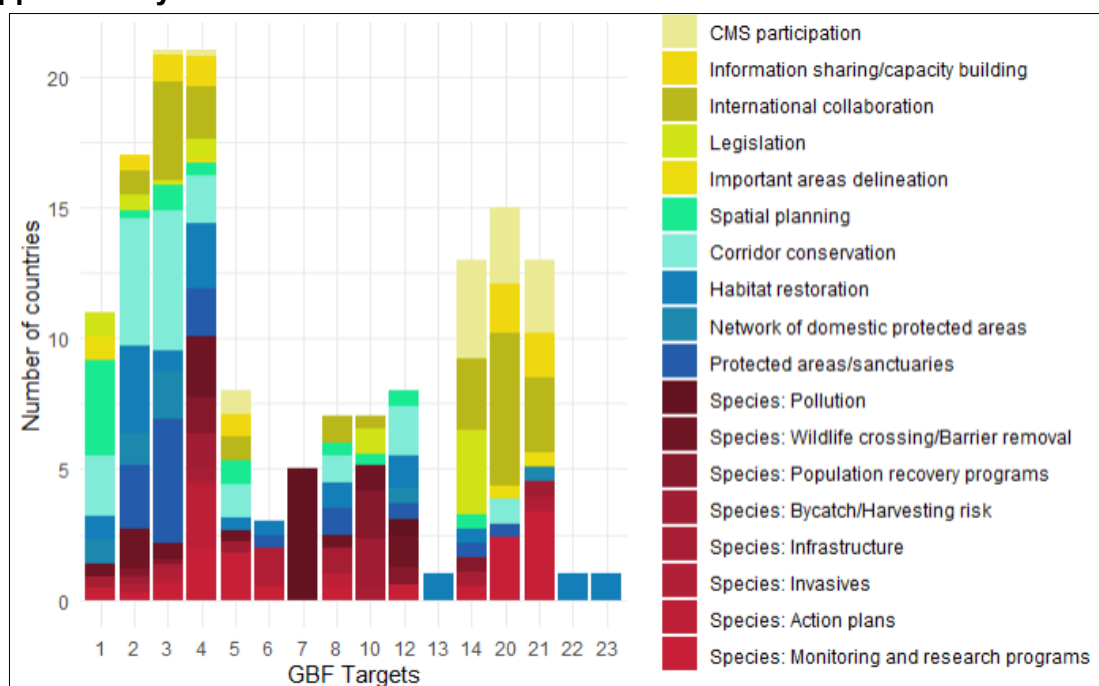

*Supplementary Figure S1: GBF targets by the kinds of actions reported<sup>12</sup>. Red shades relate to species-focused actions, blue shades relate to area-based actions, and yellow shades relate to actions focused on capacity building/international cooperation. The targets correspond to Supplementary Table S1.*

*Supplementary Table S1: Relevant Global Biodiversity Framework targets*

|            |                                                                                              |
|------------|----------------------------------------------------------------------------------------------|
| TARGET 1:  | Plan and Manage all Areas To Reduce Biodiversity Loss                                        |
| TARGET 2:  | Restore 30% of all Degraded Ecosystems                                                       |
| TARGET 3;  | Conserve 30% of Land, Waters and Seas                                                        |
| TARGET 4:  | Halt Species Extinction, Protect Genetic Diversity, and Manage Human-Wildlife Conflicts      |
| TARGET 5:  | Ensure Sustainable, Safe and Legal Harvesting and Trade of Wild Species                      |
| TARGET 6:  | Reduce the Introduction of Invasive Alien Species by 50% and Minimize Their Impact           |
| TARGET 7:  | Reduce Pollution to Levels That Are Not Harmful to Biodiversity                              |
| TARGET 8:  | Minimize the Impacts of Climate Change on Biodiversity and Build Resilience                  |
| TARGET 10: | Enhance Biodiversity and Sustainability in Agriculture, Aquaculture, Fisheries, and Forestry |
| TARGET 12: | Enhance Green Spaces and Urban Planning for Human Well-Being and Biodiversity                |

|            |                                                                                                                 |
|------------|-----------------------------------------------------------------------------------------------------------------|
| TARGET 13: | Increase the Sharing of Benefits From Genetic Resources, Digital Sequence Information and Traditional Knowledge |
| TARGET 14: | Integrate Biodiversity in Decision-Making at Every Level                                                        |
| TARGET 20: | Strengthen Capacity-Building, Technology Transfer, and Scientific and Technical Cooperation for Biodiversity    |
| TARGET 21: | Ensure That Knowledge Is Available and Accessible To Guide Biodiversity Action                                  |
| TARGET 22: | Ensure Participation in Decision-Making and Access to Justice and Information Related to Biodiversity for all   |
| TARGET 23: | Ensure Gender Equality and a Gender-Responsive Approach for Biodiversity Action                                 |

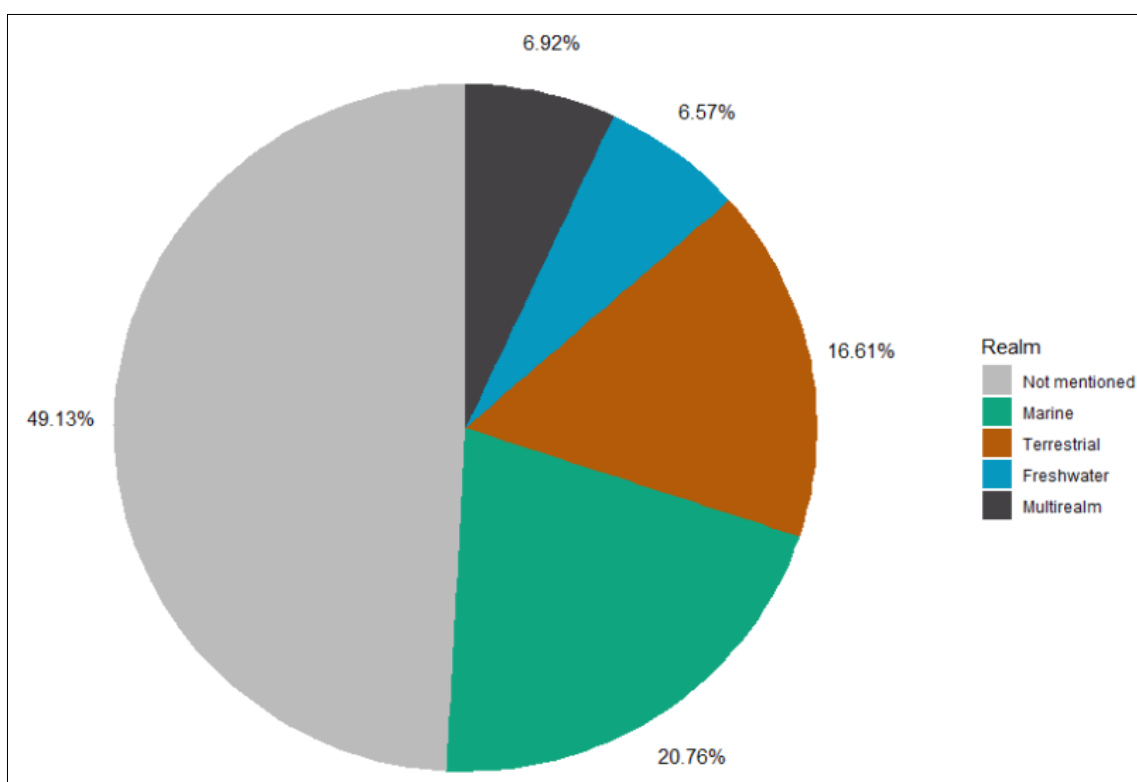

Supplementary Figure S2: The number of actions under each category and their relevant ecological realm<sup>16</sup>

Supplementary Table S2:

| Codes                      | Description, examples of what to include                                                                                                                                                             |
|----------------------------|------------------------------------------------------------------------------------------------------------------------------------------------------------------------------------------------------|
| CMS participation          | Whether NBSAP included mention of CMS involvement or intentions to become a signatory/party. Also code action with "International collaboration" so it can count towards totals in both codes)       |
| Important area delineation | Typically to capture actions increasing KBA coverage, but also includes any efforts/actions to identify species hotspots and important areas. Typically also related to the "spatial planning" code. |

|                                                                                |                                                                                                                                                                                                                                                     |
|--------------------------------------------------------------------------------|-----------------------------------------------------------------------------------------------------------------------------------------------------------------------------------------------------------------------------------------------------|
| Information sharing/capacity building                                          | Actions related to education, outreach, hosting working groups/conferences                                                                                                                                                                          |
| International collaboration (partnerships/regional action plans/intl networks) | Involves any sort of regional/transboundary collaboration, including regional protected area networks, involvement in multilateral environmental agreements (eg. Ramsar, CITES, but also CMS - include this code when putting in CMS participation) |
| Legislation                                                                    | For either actions referring to any existing legislation or action plans that have already been enacted prior to the start year of the NBSAP, or for efforts to implement future legislative actions                                                |
| Spatial planning                                                               | Actions related to producing spatial plans for identifying areas for conservation actions. The "Important area delineation" should also fall under this code.                                                                                       |
| Corridor                                                                       | Actions related to identifying/delineating, restoring, and/or protecting corridors. Often overlap with other area-based actions such as habitat restoration or protected area creation and protection.                                              |
| Habitat restoration                                                            | Related to habitat or ecosystem restoration actions                                                                                                                                                                                                 |
| Network of domestic protected areas                                            | Related to actions to increase the connectivity between domestic protected areas. Actions with this code should also have the "Protected areas/sanctuaries" code.                                                                                   |
| Protected areas/sanctuaries                                                    | Related to establishing or enhancing protection at protected areas/sanctuaries                                                                                                                                                                      |
| Species: Monitoring and research programs                                      | Actions related to data gathering (eg. bird banding, deploying satellite tagging, photo ID) and research production                                                                                                                                 |
| Species: Pollution                                                             | For a related to reducing pollution for migratory movements/species, including light, noise, air, water, etc.                                                                                                                                       |
| Species: Wildlife crossing/Barrier removal                                     | For action related to removing barriers to movement (eg. Reducing freshwater fish migratory paths), building wildlife crossings                                                                                                                     |
| Species: Population recovery programs                                          | For actions related to breeding / reproductive assistance, reintroductions, wildlife health                                                                                                                                                         |
| Species: Bycatch/Harvesting risk                                               | Is the action related to risks caused by extraction/cultivation industries such as aquaculture, fisheries, poaching, etc                                                                                                                            |
| Species: Action plans                                                          | The implementation or initiation of a specific reference to a species action plan.                                                                                                                                                                  |
| Species: Invasives                                                             | Actions related to invasive species management                                                                                                                                                                                                      |
| Species: Infrastructure                                                        | Actions supporting the protection and restoration of species and populations due to infrastructure development                                                                                                                                      |

### Supplementary Data

See Supplementary Data file.
