# Supplementary material
Source: Research Square preprint supplement (doi:10.21203/rs.3.rs-8868377/v1)
Supplement: Supplementary file 2 [file da93fa662b04ad27421edee8.xlsx]

## Sheet: Extraction Methods
	Field	Methodology	Used in the paper (Yes/No)
1	Country	Country	Yes
2	Region	Africa, Asia, Europe, Oceania, North America, South America	Yes
3	Language	Language of the NBSAP (if not English, was translated using the DeepL Translator)	Yes
4	Submission date	Submission date as appearing on the CBD NBSAP Online Reporting Tool	Yes
5	Status	Status of completion as appearing on the CBD NBSAP Online Reporting Tool	Yes
6	Date of completion and adoption	Date as appearing on the CBD NBSAP Online Reporting Tool	Yes
7	Start year	Start year identified in the NBSAP	Yes
8	End year	End year identified in the NBSAP	Yes
9	CMS party?	Yes/No	Yes
10	Mention of migratory conservation?	Yes/No. If any of its actions are considered "explicit" to migratory species in field #15, this is a "Yes"	Yes
11	Species+	Number of species listed in the Species+ website for the country	No
12	CMS	Number of species listed in the CMS website for the country	No
13	Action (copy-paste) (translated using DeepL, and Google Translate for Thai)	Directly copy pasted from the NBSAP document, in English (translated by DeepL if not English).	Yes
14	Type of action	One of 18 codes, see sheet 3 Action Type Codes	Yes
15	Explicit mention of "migrat*"?	Yes/No. If the action itself is directly in reference to a migratory species or if the action explicitly states "migration" (and other mig* derive words), this is considered a "Yes". If only CMS mentioned, consider it "Explicit" as well.	Yes
16	Migratory species mentioned, common names separated by a ;	Listing all migratory species	Yes
17	New or Existing Action	Action is considered "New" if the action referred to plans to develop/implement the action. If the action already existed as an national strategy or action plan, it was considered “existing”, including if the action is to end sometime during the NBSAP (eg. 2020 - 2027). If no explicit indication is expressed in the text, lean towards marking the action as "new".	Yes
18	Affiliated GBF target (;)	List either the GBF target(s) explicitly mentioned in relation to that action in the NBSAP, or if it is not listed, attribute the action to the most relevant target	Yes
19	Was target explicitly stated	Explicit/Implicit/Potential. If the target(s) were not explicitly listed in the NBSAP, note here that it is "Implicit" if you are relatively confident that the action fits into the target you have identified, or "Potential" if you are unsure.	Yes
20	Marine/Terrestrial/Freshwater/Not mentioned	The realm if it is explicitly mentioned, relevant to the species mentioned, relevant to the ecosystem/context it is in. But if none of the above applies, put "Not mentioned".	Yes
21	Notes	Any additional notes	No

## Sheet: Action Type Codes
	Codes	Description, examples of what to include
1	CMS participation	Whether NBSAP included mention of CMS involvement or intentions to become a signatory/party. Also code action with "International collaboration" so it can count towards totals in both codes)
2	Important area delineation	Typically to capture actions increasing KBA coverage, but also includes any efforts/actions to identify species hotpots and important areas. Typically also related to the "spatial planning" code.
3	Information sharing/capacity building	Actions related to education, outreach, hosting working groups/conferences
4	International collaboration (partnerships/regional action plans/intl networks)	Involves any sort of regional/transboundary collaboration, including regional protected area networks, involvement in multilateral environmental agreements (eg. Ramsar, CITES, but also CMS - include this code when putting in CMS participation)
5	Legislation	For either actions referring to any existing legislation or action plans that have already been enacted prior to the start year of the NBSAP, or for efforts to implement future legislative actions
6	Spatial planning	Actions related to producing spatial plans for identifying areas for conservation actions. The "Important area delineation" should also fall under this code.
7	Corridor	Actions related to identifying/delineating, restoring, and/or protecting corridors. Often overlap with other area-based actions such as habitat restoration or protected area creation and protection.
8	Habitat restoration	Related to habitat or ecosystem restoration actions
9	Network of domestic protected areas	Related to actions to increase the connectivity between domestic protected areas. Actions with this code should also have the "Protected areas/sanctuaries" code.
10	Protected areas/sanctuaries	Related to establishing or enhancing protection at protected areas/sanctuaries
11	Species: Monitoring and research programs	Actions related to data gathering (eg. bird banding, deploying satellite tagging, photo ID) and research production
12	Species: Pollution	For a related to reducing pollution for migratory movements/species, including light, noise, air, water, etc.
13	Species: Wildlife crossing/Barrier removal	For action related to removing barriers to movement (eg. Reducing freshwater fish migratory paths), building wildlife crossings
14	Species: Population recovery programs	For actions related to breeding / reproductive assistance, reintroductions, wildlife health
15	Species: Bycatch/Harvesting risk	Is the action related to risks caused by extraction/cultivation industries such as aquaculture, fisheries, poaching, etc
16	Species: Action plans	The implementation or initiation of a specific reference to a species action plan.
17	Species: Invasives	Actions related to invasive species management
18	Species: Infrastructure	Actions supporting the protection and restoration of species and populations due to infrastructure development
